# Supplementary material for: Revealing the TMA2SnI4/GaN band alignment and carrier transfer across the interface
Source: Royal Society of Chemistry journal article supplement (doi:10.1039/d4tc03203a), 2024-01-01
Supplement: d4tc03203a1.pdf [file d4tc03203a1.pdf]

Electronic Supplementary Information for

***Revealing the  $TMA_2SnI_4$ /GaN band alignment and  
carrier transfer across the interface***

*E. Zdanowicz<sup>1\*</sup>, Ł. Przypis<sup>1,2,3</sup>, W. Żuraw<sup>1,2,3</sup>, M. Grodzicki<sup>1,4</sup>, M. Chlipała<sup>5</sup>,*

*C. Skierbiszewski<sup>5</sup>, A.P. Herman<sup>1</sup> and R. Kudrawiec<sup>1,4</sup>*

*<sup>1</sup>Department of Semiconductor Materials Engineering, Wrocław University of Science and  
Technology, Wybrzeże Wyspiańskiego 27, 50-370 Wrocław, Poland*

*<sup>2</sup>Saule Research Institute, Duńska 11, 54-427 Wrocław, Poland*

*<sup>3</sup>Saule Technologies, Duńska 11, 54-427 Wrocław, Poland*

*<sup>4</sup>Łukasiewicz Research Network – PORT Polish Center for Technology Development,  
Stabłowicka 147, Wrocław 54-066, Poland*

*<sup>5</sup>Institute of High-Pressure Physics, Polish Academy of Sciences, Sokołowska 29/37, 01-142  
Warszawa, Poland*

*\*ewelina.zdanowicz@pwr.edu.pl*

## Contactless electroreflectance:

(a)

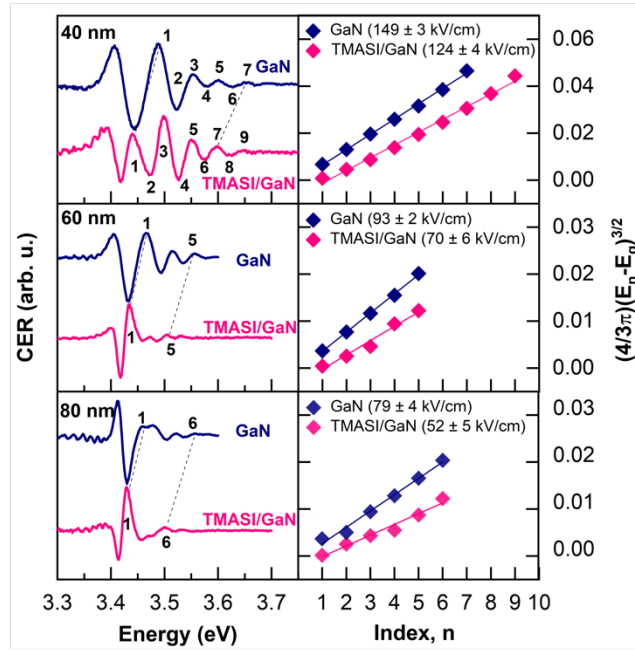

(b)

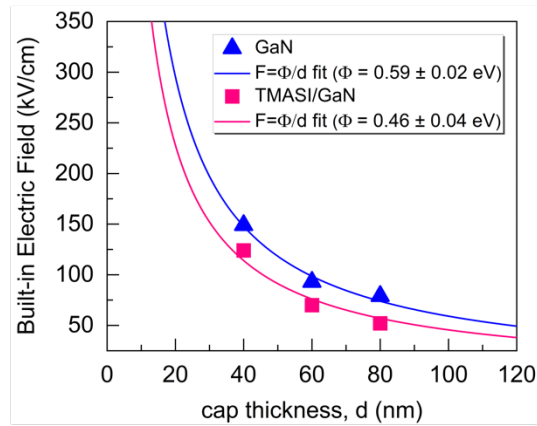

Figure S1 (a) CER spectra (left panels) and analysis of the built-in electric field (right panels) for reference GaN and TMA<sub>2</sub>SnI<sub>4</sub>/GaN:Si hybrids. (b) Evaluation of surface barrier height.

Figure S1 (a) shows CER spectra of the set of TMA<sub>2</sub>SnI<sub>4</sub>/GaN:Si samples with varying thickness (40, 60, 80 nm) of undoped cap in van Hoof structure. In each spectrum, a resonance corresponding to the GaN bandgap (approximately 3.45 eV) is succeeded by the FKO (numbered). Notably, for TMA<sub>2</sub>SnI<sub>4</sub>-coated structures, a reduction in the FKO period is evident, indicating a decrease in the built-in electric field's magnitude in the presence of perovskite. This observation aligns with the calculated values of the built-in electric field presented in the right-hand panels of Figure S1(a), obtained using equations (2) and (3) detailed in the main part of

the manuscript. According to equation (4) ( $\Phi_n = Fd$ ), the reduction in the built-in electric field for  $\text{TMA}_2\text{SnI}_4$  covered GaN signifies a decrease in the surface barrier for electrons at the  $\text{TMA}_2\text{SnI}_4/\text{GaN}:\text{Si}$  interface. Figure S1(b) illustrates the determination of the surface barrier height by fitting the electric fields extracted from the CER experiment using the relation  $\Phi_n = Fd$ . The obtained  $\Phi_n$  values are  $(0.59 \pm 0.02 \text{ eV})$  for reference GaN and  $(0.46 \pm 0.04 \text{ eV})$  for  $\text{TMA}_2\text{SnI}_4/\text{GaN}:\text{Si}$  interface.

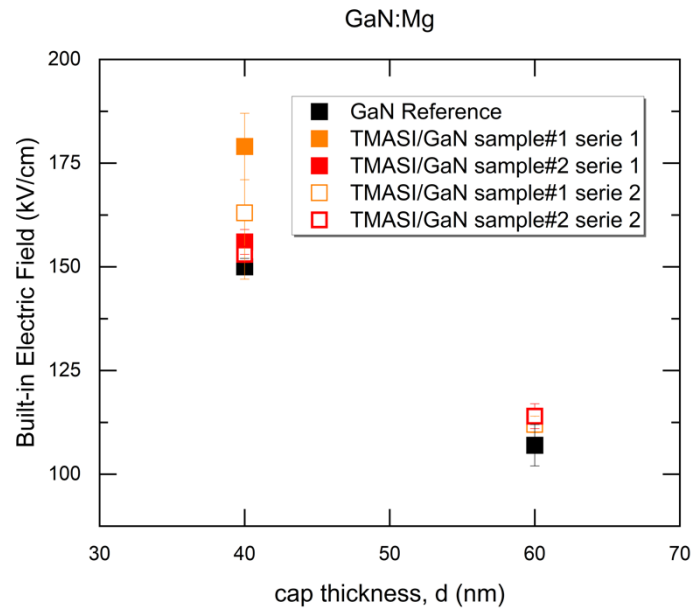

*Figure S2 Built-in electric fields obtained for two series of  $\text{TMA}_2\text{SnI}_4/\text{GaN}:\text{Mg}$  samples.*

Figure S2 presents values of built-in electric fields acquired from CER spectra measured for two series of reference GaN:Mg substrates and  $\text{TMA}_2\text{SnI}_4/\text{GaN}:\text{Mg}$  hybrids. As evident within the range of experimental uncertainties, consistent values of the built-in electric field were obtained for investigated cap thicknesses, demonstrating the repeatability of the observed phenomena.

### **X-ray photoelectron spectroscopy**

The surface electronic and chemical properties were examined using X-ray photoelectron spectroscopy (XPS) with a monochromatic  $\text{Al}_{K\alpha}$  (1486.6 eV) radiation source. Photoelectrons were collected by a hemispherical electron energy analyzer (Argus CU), with a 0.1 eV step size and a pass energy of 20 eV. The analyzer's optical axis was positioned at a  $30^\circ$  angle to the

normal of the substrate surface. The Fermi level was calibrated using a clean Ag reference sample. All XPS measurements were performed at room temperature.

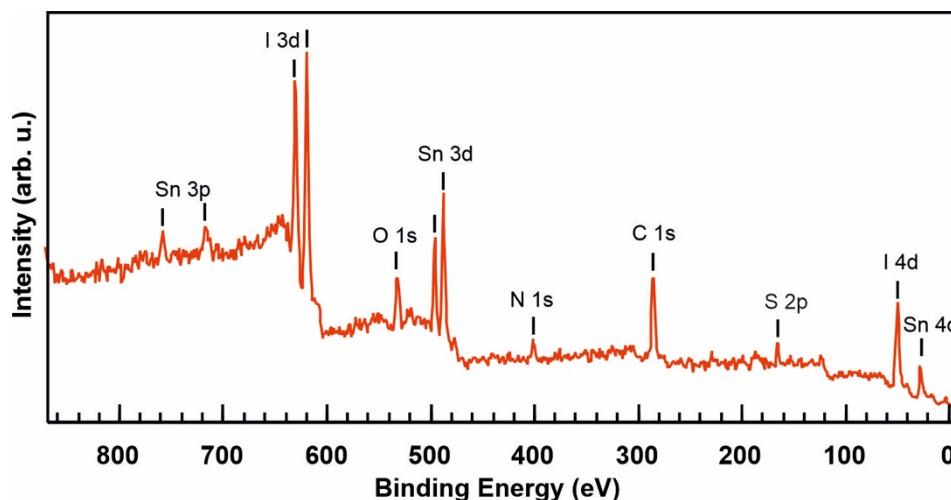

*Figure S3 The XPS survey spectrum of  $\text{TMA}_2\text{SnI}_4$  measured in the wide spectral range.*

Figure S3 shows a wide XPS survey spectrum of  $\text{TMA}_2\text{SnI}_4$  layer spin-coated on glass substrate confirming the presence of elements within the compound.

### Steady-state photoluminescence:

300 nm  $\text{TMA}_2\text{SnI}_4$  layer spin-coated on glass substrate was excited by a 532 nm CW laser with an excitation power of 250  $\mu\text{W}$ . PL signal was detected with Avantes AvaSpec CCD detector.

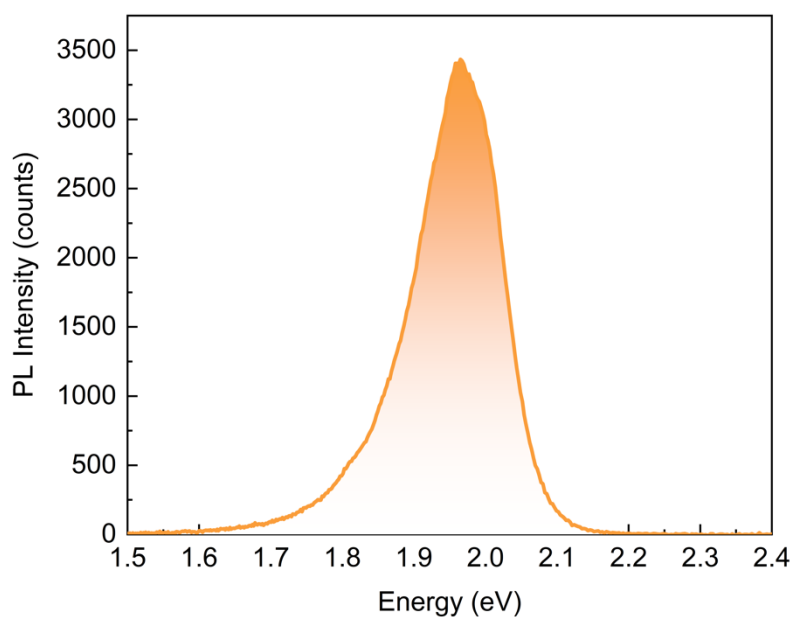

*Figure S4 Room temperature PL spectrum of 300nm thick  $\text{TMA}_2\text{SnI}_4$  layer.*

### Time-resolved photoluminescence:

The samples were excited by a 532 nm picosecond pulsed laser, operating at a repetition rate of 1 MHz and an average power density of approximately 0.4 W/cm<sup>2</sup>. Photoluminescence (PL) decay at 600 nm was recorded using a system comprising a 0.3 m focal length monochromator and a time-correlated single photon counting module (Becker & Hickl SPC-150-NX) equipped with a PMC-150-04 detector.

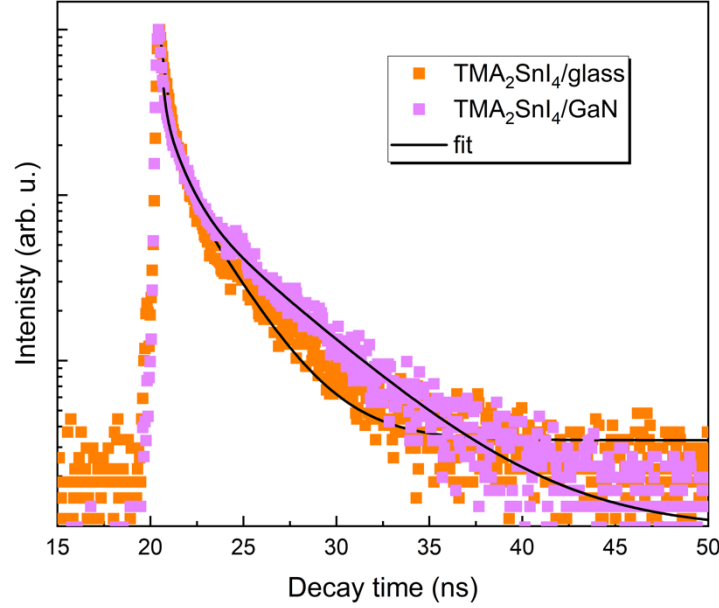

*Figure S5 Time-resolved photoluminescence decays of TMA<sub>2</sub>SnI<sub>4</sub>/GaN and reference TMA<sub>2</sub>SnI<sub>4</sub>/glass structures.*

Carrier dynamics on TMA<sub>2</sub>SnI<sub>4</sub>/GaN interface was investigated by time-resolved photoluminescence (TRPL). The TMA<sub>2</sub>SnI<sub>4</sub> spin-coated on glass substrate was taken as a reference. As it can be seen in Figure S5, PL decays registered for both types of samples are similar. Measured curves were fitted with the following multi-exponential decays [1]:

$$I(t) = A_1 \exp\left(-\frac{t}{\tau_1}\right) + A_2 \exp\left(-\frac{t}{\tau_2}\right) + A_3 \exp\left(-\frac{t}{\tau_3}\right),$$

where  $A_1$ ,  $A_2$ ,  $A_3$  are the amplitudes and  $\tau_1$ ,  $\tau_2$ ,  $\tau_3$  are the time constants related to band-edge, defect and charge transfer recombination mechanisms [1]. Time constants obtained from fitting procedure are shown in the table below. The PL decay of reference TMA<sub>2</sub>SnI<sub>4</sub>/glass structure was fitted with bi-exponential function, since no interfacial charge transfer is expected to occur [1]. Carriers' lifetimes obtained for TMA<sub>2</sub>SnI<sub>4</sub> are consistent with those reported earlier [2]. As it can be noticed, time constants of TMA<sub>2</sub>SnI<sub>4</sub>/GaN are smaller than those obtained for TMA<sub>2</sub>SnI<sub>4</sub>/glass, suggesting the enhanced carrier recombination at the interface,

what is expected for type II band alignment. However, it should be noted that within this range of time constants, we are approaching the detection limit of our experimental setup (130 ps).

| Sample                                   | $\tau_1$ (ns)     | $\tau_2$ (ns)     | $\tau_3$ (ns)     |
|------------------------------------------|-------------------|-------------------|-------------------|
| TMA <sub>2</sub> SnI <sub>4</sub> /glass | $0.395 \pm 0.004$ | $2.314 \pm 0.042$ | -                 |
| TMA <sub>2</sub> SnI <sub>4</sub> /GaN   | $0.162 \pm 0.009$ | $0.930 \pm 0.040$ | $4.447 \pm 0.099$ |

#### References:

[1] Inorg. Chem. Front., 2022, 9, 4661-4670

[2] Dalton Trans., 2021, 50, 10261-10274
